# Supplementary material
Source: HighWire-hosted journal article supplement (https://erj.ersjournals.com/content/58/6/2102099)

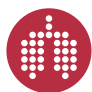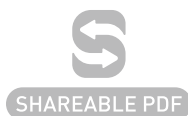

# Saliva molecular testing for SARS-CoV-2: simplifying the diagnosis without losing accuracy

Francesca Saluzzo <sup>1</sup>, Paola Mantegani<sup>1</sup>, Valeria Poletti de Chaurand <sup>1</sup>, Federica Cugnata<sup>2</sup>, Patrizia Rovere-Querini<sup>3</sup>, Marta Cilla<sup>3</sup>, Patrizia Paola Erba<sup>3</sup>, Sara Racca<sup>4</sup>, Cristina Tresoldi<sup>5</sup>, Caterina Uberti-Foppa <sup>6</sup>, Clelia Di Serio<sup>2</sup> and Daniela Maria Cirillo <sup>1</sup>

<sup>1</sup>Division of Immunology, Transplantation and Infectious Disease, IRCCS Ospedale San Raffaele, Milan, Italy. <sup>2</sup>CUSSE-University Center for Statistics in the Biomedical Sciences, Vita-Salute San Raffaele University, Milan, Italy. <sup>3</sup>IRCCS Ospedale San Raffaele and Vita-Salute San Raffaele University, Milan, Italy. <sup>4</sup>Laboratorio Microbiologia/Virologia, SMEL, IRCCS Ospedale San Raffaele, Milan, Italy. <sup>5</sup>Molecular Hematology Unit, IRCCS Ospedale San Raffaele, Milan, Italy. <sup>6</sup>Division of Infectious Diseases, IRCCS Ospedale San Raffaele and Vita-Salute San Raffaele University, Milan, Italy.

Corresponding author: Daniela Maria Cirillo ([cirillo.daniela@hsr.it](mailto:cirillo.daniela@hsr.it))

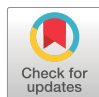

Shareable abstract (@ERSpublications)

**This study demonstrated that the use of point of care technologies on saliva represents a valid and highly specific solution to simplify, speed up and broadly distribute the diagnostic process for the control of the COVID-19 epidemic** <https://bit.ly/3oh4bds>

**Cite this article as:** Saluzzo F, Mantegani P, Poletti de Chaurand V, *et al.* Saliva molecular testing for SARS-CoV-2: simplifying the diagnosis without losing accuracy. *Eur Respir J* 2021; 58: 2102099 [DOI: 10.1183/13993003.02099-2021].

This single-page version can be shared freely online.

Copyright ©The authors 2021.

This version is distributed under the terms of the Creative Commons Attribution Non-Commercial Licence 4.0. For commercial reproduction rights and permissions contact [permissions@ersnet.org](mailto:permissions@ersnet.org)

Received: 28 July 2021  
Accepted: 22 Sept 2021

*To the Editor:*

The possibility to rely on rapid and accurate diagnostic techniques has proved itself crucial during the past year to contain the spread of SARS-CoV-2 infection [1]. Even if quantitative RT-PCR (RT-qPCR) on nasopharyngeal swab (NPS) is still considered the standard for coronavirus disease 2019 (COVID-19) diagnosis, saliva has been evaluated in several studies as a possible alternative to NPS and is currently extensively utilised in South Korea, Germany and Japan [2, 3]. Nonetheless, the use of saliva is still debated, and a rigorous standardisation of the analysis protocol is greatly needed [4–6]. The application of point-of-care technologies on saliva, able to rapidly perform highly specific and sensitive molecular testing, could prove invaluable to allow the diagnosis also in challenging and remote settings by simplifying and speeding up the diagnostic process [1].

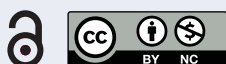

Supplement: inline-supplementary-material-1 [file inline-supplementary-material-1.pdf]
